# Supplementary material for: “A More Equitable Society”: The Politics of Global Fairness in Paralympic Sport
Source: PLoS One. 2016 Dec 12;11(12):e0167481. doi: 10.1371/journal.pone.0167481 (PMC5152818; doi:10.1371/journal.pone.0167481)
Supplement: S3 Table — Spreadsheet showing number of participants by each country + gold, silver, and bronze medals obtained by each country—for track events only (XLSX) [file pone.0167481.s003.xlsx]

## Sheet: Participants by country and cla
		T11			T11/12			T11-13			T12			T13			T20			T33			T34			T35			T35-38			T36			T37			T38			T42			T42-47			T44
		M	F	Total	M	F	Total	M	F	Total	M	F	Total	M	F	Total	M	F	Total	M	F	Total	M	F	Total	M	F	Total	M	F	Total	M	F	Total	M	F	Total	M	F	Total	M	F	Total	M	F	Total	M	F	Total
Country	Afghanistan			0			0			0			0			0			0			0			0			0			0			0			0			0	1		1			0			0
	Algeria			0			0			0		2	2	2		2			0			0			0	2		2			0	2		2	1		1	1		1			0			0			0
	Angola	3	6	9			0			0			0			0			0			0			0			0			0			0			0			0			0			0			0
	Argentina	3		3			0			0			0			0	1	2	3			0			0	4		4			0	3	2	5	3	2	5	1		1	1		1			0			0
	Australia			0			0			0			0	3		3	3	1	4			0	4	1	5		6	6		4	4	3		3	1	2	3	2	8	10	2		2			0		2	2
	Austria			0			0			0			0			0			0			0			0			0			0			0			0			0			0			0			0
	Azerbaijan	2		2			0			0	3	2	5			0			0			0			0			0			0			0			0			0			0			0			0
	Bahrain			0			0			0			0			0			0			0			0			0			0			0			0			0			0			0			0
	Belarus			0			0			0	4		4			0			0			0			0			0			0			0			0	2		2			0			0			0
	Belgium			0			0			0			0			0			0			0			0	2		2			0			0			0	2		2		1	1			0			0
	Bermuda			0			0			0			0			0			0			0			0			0			0			0			0			0			0			0			0
	Brazil	10	14	24			0	4	4	8	1	2	3	6	3	9	1		1			0			0			0			0	3	2	5			0	2		2	1	2	3			0	2		2
	Bulgaria			0			0			0			0	2		2			0			0			0			0			0			0			0			0			0			0			0
	Cameroon	1		1			0			0			0			0			0			0			0			0			0			0			0			0			0			0			0
	Canada	3		3			0			0			0	2		2			0			0	6		6		2	2			0			0	1	1	2	5		5			0			0	2	5	7
	Cape Verde			0			0			0			0			0	2		2			0			0			0			0			0			0			0			0			0	1		1
	Chile	2		2			0			0		1	1		1	1			0			0			0	1		1			0			0			0			0			0			0			0
	China	5	7	12			0	4	4	8	5	8	13	1	3	4			0			0			0	3	2	5		4	4	4		4	9	6	15	7	3	10	2		2			0			0
	Columbia		2	2			0			0			0			0			0			0			0			0			0	3		3			0	4		4			0			0			0
	Croatia			0			0			0			0			0	1	2	3			0			0			0			0			0			0			0	1		1			0			0
	Cuba			0			0			0	3	3	6			0			0			0			0			0			0			0			0			0			0			0			0
	Cyprus			0			0			0			0			0			0			0			0			0			0			0			0			0			0			0			0
	Czech Republic			0			0			0			0			0		4	4			0			0		2	2			0			0			0	1		1			0			0			0
	Denmark			0			0			0			0			0			0			0			0			0			0			0			0			0	3		3			0			0
	Egypt			0			0			0			0			0			0			0			0			0			0			0	3		3	3		3	1		1			0			0
	Estonia			0			0			0			0			0			0			0			0			0			0			0			0			0			0			0			0
	Ethiopia			0			0			0			0	1		1			0			0			0			0			0			0			0			0			0			0			0
	Finland		4	4			0			0			0			0			0			0	8		8			0			0			0			0			0			0			0			0
	France	2		2			0			0			0		2	2			0			0	3		3			0			0			0		3	3	3		3	2		2			0		4	4
	Germany			0		1	1			0	2	3	5			0			0			0			0			0			0		2	2		5	5			0	7	4	11	4		4	12	3	15
	Great Britain			0			0			0		1	1	3		3			0	2		2	7	8	15	1	2	3		4	4	4		4	1	6	7	2	5	7	3		3			0	2	2	4
	Greece			0			0			0			0			0	3		3			0			0			0			0	1		1			0	1		1			0	4		4	2		2
	Hong Kong			0			0			0			0			0	2		2			0			0			0			0		4	4			0			0			0			0			0
	Hungary			0			0			0			0			0		6	6			0			0			0			0			0			0			0			0			0			0
	Iceland			0			0			0			0			0			0			0			0			0			0			0			0			0			0			0			0
	India			0			0			0			0			0			0			0			0			0			0			0			0			0	4		4			0			0
	Indonesia	2		2			0			0			0			0			0			0			0			0			0			0			0			0			0	4		4	4		4
	Iran			0			0			0			0			0	1		1			0			0			0			0			0	2		2			0			0			0			0
	Iraq			0			0			0			0			0			0			0			0			0			0			0			0	2		2			0			0			0
	Ireland			0			0			0			0	1		1			0			0			0			0			0			0	1		1	1		1			0			0			0
	Israel			0			0			0			0			0			0			0			0			0			0			0			0			0			0			0			0
	Italy		2	2			0			0			0			0	1		1			0			0		2	2			0			0			0			0		3	3			0	4	4	8
	Jamaica			0			0			0			0			0			0			0			0			0			0			0			0			0			0			0			0
	Japan	3	2	5	3	3	6			0	3		3	2	1	3	11	6	17	1		1		2	2			0			0		2	2	2		2	1		1	3	5	8	4		4	2	4	6
	Jordan			0			0			0			0	1		1			0			0			0			0			0			0			0			0			0			0			0
	Kazakhstan	3		3			0			0			0	1		1			0			0			0			0			0	3		3	5		5			0			0			0			0
	Kuwait			0			0			0			0			0			0	2		2	1		1			0			0			0			0			0			0			0			0
	Latvia			0			0			0			0	2		2			0			0			0			0			0			0	1		1			0			0			0			0
	Libyan Arab Jamahiriya			0			0			0			0			0			0			0			0			0			0			0			0			0			0			0			0
	Lithuania			0			0			0			0	1		1			0			0			0			0			0			0			0		1	1	3		3			0			0
	Luxemborg			0			0			0			0			0			0			0			0			0			0			0			0			0			0			0			0
	Macau			0			0			0			0			0	6	1	7			0			0			0			0			0			0			0			0			0			0
	Malaysia			0			0			0	1		1			0	2	2	4			0			0			0			0	3		3			0			0			0			0			0
	Mexico		4	4			0			0	3	3	6	2	1	3			0			0			0			0			0	2	2	4			0	1	3	4			0			0			0
	Mongolia			0			0			0			0			0			0			0			0			0			0			0			0			0			0			0			0
	Montenegro			0			0			0	1		1			0			0			0			0			0			0			0			0			0			0			0			0
	Morocco			0	1		1			0			0	10	3	13			0			0			0			0			0			0	1		1	1		1			0			0			0
	Mozambique			0			0			0	2	3	5	2	3	5			0			0			0			0			0	2		2			0			0			0			0			0
	Namibia	2	3	5			0			0			0	2	1	3			0			0			0			0			0			0		4	4			0			0			0	1		1
	Netherlands			0			0			0			0			0	2	3	5			0	3	5	8		2	2			0			0	2		2			0	1		1			0	2	8	10
	New Zealand			0		1	1			0			0	1		1			0			0			0	2		2			0	3		3			0			0			0			0	2		2
	Nicaragua			0			0			0			0			0			0			0			0			0			0	3		3			0			0			0			0			0
	Nigeria		2	2			0			0			0			0			0			0			0			0			0			0			0			0			0			0			0
	Norway			0			0			0			0	2		2			0			0			0			0			0			0			0			0			0			0			0
	Pakistan			0			0			0	1		1			0			0			0			0			0			0			0	1		1	2		2			0			0			0
	Panama			0			0			0			0			0			0			0			0			0			0			0			0			0			0			0			0
	Papua New Guinea			0			0			0			0			0			0			0			0			0			0			0			0			0			0			0			0
	Philippines			0			0			0			0			0			0			0			0			0			0			0			0			0			0			0			0
	Poland	1		1			0			0			0	4		4	8	6	14			0			0		2	2			0	5		5		3	3			0	1		1			0	2		2
	Portugal	3	1	4	2		2	4		4	4		4	3		3	10	7	17			0			0			0			0			0			0		2	2			0			0			0
	Qatar			0			0			0			0			0	1		1			0	5		5	1		1			0			0			0			0			0			0			0
	Russia	1	2	3	1	1	2	4	4	8	8	1	9	8	3	11	7	6	13			0			0	4		4		4	4	10	2	12	7	7	14	3	4	7	2		2	4		4	1		1
	Rwanda			0			0			0			0			0			0			0			0			0			0			0			0			0			0			0			0
	Saudi Arabia			0			0			0			0			0	3		3			0			0			0			0			0			0			0			0			0			0
	Senegal			0			0			0			0			0			0			0			0			0			0			0			0			0			0			0			0
	Serbia			0			0			0			0			0			0			0			0			0			0			0			0			0			0			0			0
	Slovakia			0			0			0			0			0			0			0			0			0			0			0			0			0			0			0			0
	Slovenia		1	1			0			0			0			0			0			0			0			0			0			0			0			0			0			0			0
	South Africa		2	2			0			0	4		4		5	5			0			0			0	2		2			0			0	6		6	6	1	7			0			0	4		4
	Spain	7	2	9	1	2	3	4	4	8	2	5	7	4	1	5	4		4			0			0			0			0	4		4			0	2		2			0			0			0
	Sri Lanka			0			0			0			0			0			0			0			0			0			0			0			0			0	5		5	4		4	3		3
	Sweden			0			0			0	2		2	2		2		2	2			0			0			0			0			0			0			0			0			0			0
	Switzerland		1	1			0			0			0	2		2			0			0	4		4			0			0			0			0			0			0			0			0
	Syrian Arab Republic			0			0			0			0			0			0			0			0			0			0			0			0			0			0			0			0
	Thailand	3	3	6			0	4		4	1		1	2		2			0			0			0			0			0			0			0			0			0			0			0
	Trinidad and Tobago			0			0			0			0			0			0			0			0			0			0			0			0			0			0			0		2	2
	Tunisia			0			0			0			0		2	2			0			0	4		4			0			0			0			0	2		2			0			0			0
	Turkey	6	5	11			0			0			0	6		6	1	1	2			0			0			0			0			0			0			0	1		1			0			0
	Ukraine	1		1			0			0		5	5		1	1	1	3	4			0			0	2	2	4			0	4		4	4		4		2	2			0			0			0
	United Arab Emirates			0			0			0			0			0			0			0	4		4			0			0			0			0			0			0			0			0
	USA	4	1	5			0			0	1		1	7	3	10	4		4			0	4	3	7	2	2	4			0			0	3		3	2		2	7	4	11	4		4	11	9	20
	Uzbekistan	2		2			0	4		4	4		4	4		4			0			0			0			0			0			0			0			0			0			0			0
	Venezuela			0			0			0			0			0	3	4	7			0			0			0			0			0			0			0			0			0			0
	Vietnam	2	1	3			0			0			0			0			0			0			0			0			0			0			0			0			0			0			0
	Virgin Islands			0			0			0			0			0			0			0			0			0			0			0	1		1			0			0			0			0
	Chinese Taipei	2	2	4			0			0			0			0			0			0			0			0			0			0			0			0			0			0			0
[truncated: 27 more columns]

## Sheet: Gold medals 
		T11			T11/12			T11-13			T12			T13			T20			T33			T34			T35			T35-38			T36			T37			T38			T42			T42-47			T44
		M	F	Total	M	F	Total	M	F	Total	M	F	Total	M	F	Total	M	F	Total	M	F	Total	M	F	Total	M	F	Total	M	F	T	M	F	Total	M	F	Total	M	F	Total	M	F	Total	M	F	Total	M	F	Total
Country	Afghanistan			0			0			0			0			0			0			0			0			0			0			0			0			0			0			0			0
	Algeria			0			0			0			0			0			0			0			0			0			0			0			0			0			0			0			0
	Angola			0			0			0			0			0			0			0			0			0			0			0			0			0			0			0			0
	Argentina			0			0			0			0			0			0			0			0			0			0			0			0			0			0			0			0
	Australia			0			0			0			0			0			0			0			0		2	2			0			0			0			0	1		1			0			0
	Austria			0			0			0			0			0			0			0			0			0			0			0			0			0			0			0			0
	Azerbaijan			0			0			0	1		1			0			0			0			0			0			0			0			0			0			0			0			0
	Bahrain			0			0			0			0			0			0			0			0			0			0			0			0			0			0			0			0
	Belarus			0			0			0	1		1			0			0			0			0			0			0			0			0			0			0			0			0
	Belgium			0			0			0			0			0			0			0			0			0			0			0			0			0			0			0			0
	Bermuda			0			0			0			0			0			0			0			0			0			0			0			0			0			0			0			0
	Brazil	3	2	5			0			0			0	1		1	1		1			0			0			0			0			0			0			0			0			0			0
	Bulgaria			0			0			0			0			0			0			0			0			0			0			0			0			0			0			0			0
	Cameroon			0			0			0			0			0			0			0			0			0			0			0			0			0			0			0			0
	Canada			0			0			0			0	1		1			0			0			0			0			0			0			0			0			0			0			0
	Cape Verde			0			0			0			0			0			0			0			0			0			0			0			0			0			0			0			0
	Chile	1		1			0			0			0			0			0			0			0			0			0			0			0			0			0			0			0
	China		4	4			0		1	1			0			0			0			0			0			0			0			0	1	1	2	3		3			0			0			0
	Columbia			0			0			0			0			0			0			0			0			0			0			0			0	1		1			0			0			0
	Croatia			0			0			0			0			0		1	1			0			0			0			0			0			0			0			0			0			0
	Cuba			0			0			0	2	3	5			0			0			0			0			0			0			0			0			0			0			0			0
	Cyprus			0			0			0			0			0			0			0			0			0			0			0			0			0			0			0			0
	Czech Republic			0			0			0			0			0			0			0			0			0			0			0			0			0			0			0			0
	Denmark			0			0			0			0			0			0			0			0			0			0			0			0			0			0			0			0
	Egypt			0			0			0			0			0			0			0			0			0			0			0			0			0			0			0			0
	Estonia			0			0			0			0			0			0			0			0			0			0			0			0			0			0			0			0
	Ethiopia			0			0			0			0			0			0			0			0			0			0			0			0			0			0			0			0
	Finland			0			0			0			0			0			0			0			0			0			0			0			0			0			0			0			0
	France			0			0			0			0		1	1			0			0			0			0			0			0			0			0			0			0		2	2
	Germany			0			0			0			0			0			0			0			0			0			0			0			0			0		1	1	1		1	2		2
	Great Britain			0			0			0			0			0			0			0		3	3			0		1	1	1		1		2	2		1	1	1		1			0			0
	Greece			0			0			0			0			0			0			0			0			0			0			0			0			0			0			0			0
	Hong Kong			0			0			0			0			0			0			0			0			0			0			0			0			0			0			0			0
	Hungary			0			0			0			0			0			0			0			0			0			0			0			0			0			0			0			0
	Iceland			0			0			0			0			0			0			0			0			0			0			0			0			0			0			0			0
	India			0			0			0			0			0			0			0			0			0			0			0			0			0			0			0			0
	Indonesia			0			0			0			0			0			0			0			0			0			0			0			0			0			0			0			0
	Iran			0			0			0			0			0			0			0			0			0			0			0			0			0			0			0			0
	Iraq			0			0			0			0			0			0			0			0			0			0			0			0			0			0			0			0
	Ireland			0			0			0			0	1		1			0			0			0			0			0			0	1		1	1		1			0			0			0
	Israel			0			0			0			0			0			0			0			0			0			0			0			0			0			0			0			0
	Italy			0			0			0			0			0			0			0			0			0			0			0			0			0		1	1			0			0
	Jamaica			0			0			0			0			0			0			0			0			0			0			0			0			0			0			0			0
	Japan			0			0			0			0			0	1		1			0			0			0			0			0			0			0	1		1			0			0
	Jordan			0			0			0			0			0			0			0			0			0			0			0			0			0			0			0			0
	Kazakhstan			0			0			0			0			0			0			0			0			0			0			0			0			0			0			0			0
	Kuwait			0			0			0			0			0			0	1		1			0			0			0			0			0			0			0			0			0
	Latvia			0			0			0			0			0			0			0			0			0			0			0			0			0			0			0			0
	Libyan Arab Jamahiriya			0			0			0			0			0			0			0			0			0			0			0			0			0			0			0			0
	Lithuania			0			0			0			0			0			0			0			0			0			0			0			0			0			0			0			0
	Luxemborg			0			0			0			0			0			0			0			0			0			0			0			0			0			0			0			0
	Macau			0			0			0			0			0			0			0			0			0			0			0			0			0			0			0			0
	Malaysia			0			0			0			0			0	1		1			0			0			0			0	1		1			0			0			0			0			0
	Mexico			0			0			0			0			0			0			0			0			0			0			0			0			0			0			0			0
	Mongolia			0			0			0			0			0			0			0			0			0			0			0			0			0			0			0			0
	Montenegro			0			0			0			0			0			0			0			0			0			0			0			0			0			0			0			0
	Morocco			0	1		1			0			0	2		2			0			0			0			0			0			0			0			0			0			0			0
	Mozambique			0			0			0			0			0			0			0			0			0			0			0			0			0			0			0			0
	Namibia			0			0			0			0	1		1			0			0			0			0			0			0			0			0			0			0			0
	Netherlands			0			0			0			0			0			0			0			0			0			0			0			0			0			0			0		2	2
	New Zealand			0			0			0			0			0			0			0			0			0			0			0			0			0			0			0			0
	Nicaragua			0			0			0			0			0			0			0			0			0			0			0			0			0			0			0			0
	Nigeria			0			0			0			0			0			0			0			0			0			0			0			0			0			0			0			0
	Norway			0			0			0			0			0			0			0			0			0			0			0			0			0			0			0			0
	Pakistan			0			0			0			0			0			0			0			0			0			0			0			0			0			0			0			0
	Panama			0			0			0			0			0			0			0			0			0			0			0			0			0			0			0			0
	Papua New Guinea			0			0			0			0			0			0			0			0			0			0			0			0			0			0			0			0
	Philippines			0			0			0			0			0			0			0			0			0			0			0			0			0			0			0			0
	Poland			0			0			0			0			0		4	4			0			0			0			0			0			0			0			0			0	1		1
	Portugal			0			0			0	1		1			0	1		1			0			0			0			0			0			0			0			0			0			0
	Qatar			0			0			0			0			0			0			0			0			0			0			0			0			0			0			0			0
	Russia			0		1	1	1		1			0	1		1	1		1			0			0	2		2			0	3	2	5	3	1	4		3	3			0			0			0
	Rwanda			0			0			0			0			0			0			0			0			0			0			0			0			0			0			0			0
	Saudi Arabia			0			0			0			0			0			0			0			0			0			0			0			0			0			0			0			0
	Senegal			0			0			0			0			0			0			0			0			0			0			0			0			0			0			0			0
	Serbia			0			0			0			0			0			0			0			0			0			0			0			0			0			0			0			0
	Slovakia			0			0			0			0			0			0			0			0			0			0			0			0			0			0			0			0
	Slovenia			0			0			0			0			0			0			0			0			0			0			0			0			0			0			0			0
	South Africa			0			0			0			0		2	2			0			0			0			0			0			0			0			0			0			0			0
	Spain			0			0			0			0			0			0			0			0			0			0			0			0			0			0			0			0
	Sri Lanka			0			0			0			0			0			0			0			0			0			0			0			0			0			0			0			0
	Sweden			0			0			0			0	1		1			0			0			0			0			0			0			0			0			0			0			0
	Switzerland			0			0			0			0			0			0			0			0			0			0			0			0			0			0			0			0
	Syrian Arab Republic			0			0			0			0			0			0			0			0			0			0			0			0			0			0			0			0
	Thailand			0			0			0			0			0			0			0			0			0			0			0			0			0			0			0			0
	Trinidad and Tobago			0			0			0			0			0			0			0			0			0			0			0			0			0			0			0			0
	Tunisia			0			0			0			0		1	1			0			0	4		4			0			0			0			0	1		1			0			0			0
	Turkey			0			0			0			0			0			0			0			0			0			0			0			0			0			0			0			0
	Ukraine			0			0			0		1	1			0			0			0			0			0			0			0			0			0			0			0			0
	United Arab Emirates			0			0			0			0			0			0			0			0			0			0			0			0			0			0			0			0
	USA	2		2			0			0			0			0	1		1			0			0			0			0			0			0			0	1		1			0	2		2
	Uzbekistan			0			0			0			0			0			0			0			0			0			0			0			0			0			0			0			0
	Venezuela			0			0			0			0			0			0			0			0			0			0			0			0			0			0			0			0
	Vietnam			0			0			0			0			0			0			0			0			0			0			0			0			0			0			0			0
	Virgin Islands			0			0			0			0			0			0			0			0			0			0			0			0			0			0			0			0
	Chinese Tapei			0			0			0			0			0			0			0			0			0			0			0			0			0			0			0			0
[truncated: 27 more columns]

## Sheet: Silver medals
		T11			T11/12			T11-13			T12			T13			T20			T33			T34			T35			T35-38			T36			T37			T38			T42			T42-47			T44
		M	F	Total	M	F	Total	M	F	Total	M	F	Total	M	F	Total	M	F	Total	M	F	Total	M	F	Total	M	F	Total	M	F	T	M	F	Total	M	F	Total	M	F	Total	M	F	Total	M	F	Total	M	F	Total
Country	Afghanistan			0			0			0			0			0			0			0			0			0			0			0			0			0			0			0			0
	Algeria			0			0			0		1	1	2		2			0			0			0			0			0			0			0			0			0			0			0
	Angola		1	1			0			0			0			0			0			0			0			0			0			0			0			0			0			0			0
	Argentina			0			0			0			0			0			0			0			0			0			0		1	1			0			0			0			0			0
	Australia			0			0			0			0	1		1			0			0			0			0			0			0	1		1			0			0			0			0
	Austria			0			0			0			0			0			0			0			0			0			0			0			0			0			0			0			0
	Azerbaijan	1		1			0			0		1	1			0			0			0			0			0			0			0			0			0			0			0			0
	Bahrain			0			0			0			0			0			0			0			0			0			0			0			0			0			0			0			0
	Belarus			0			0			0	1		1			0			0			0			0			0			0			0			0			0			0			0			0
	Belgium			0			0			0			0			0			0			0			0			0			0			0			0			0			0			0			0
	Bermuda			0			0			0			0			0			0			0			0			0			0			0			0			0			0			0			0
	Brazil	1	4	5			0			0			0	1		1			0			0			0			0			0			0			0	1		1			0			0	1		1
	Bulgaria			0			0			0			0			0			0			0			0			0			0			0			0			0			0			0			0
	Cameroon			0			0			0			0			0			0			0			0			0			0			0			0			0			0			0			0
	Canada	1		1			0			0			0			0			0			0			0			0			0			0			0			0			0			0			0
	Cape Verde			0			0			0			0			0			0			0			0			0			0			0			0			0			0			0			0
	Chile	1		1			0			0			0			0			0			0			0			0			0			0			0			0			0			0			0
	China			0			0			0	2		2			0			0			0			0			0			0			0	1		1		2	2			0			0			0
	Columbia		1	1			0			0			0			0			0			0			0			0			0			0			0			0			0			0			0
	Croatia			0			0			0			0			0	1	1	2			0			0			0			0			0			0			0			0			0			0
	Cuba			0			0			0			0			0			0			0			0			0			0			0			0			0			0			0			0
	Cyprus			0			0			0			0			0			0			0			0			0			0			0			0			0			0			0			0
	Czech Republic			0			0			0			0			0			0			0			0			0			0			0			0			0			0			0			0
	Denmark			0			0			0			0			0			0			0			0			0			0			0			0			0	1		1			0			0
	Egypt			0			0			0			0			0			0			0			0			0			0			0			0			0	1		1			0			0
	Estonia			0			0			0			0			0			0			0			0			0			0			0			0			0			0			0			0
	Ethiopia			0			0			0			0			0			0			0			0			0			0			0			0			0			0			0			0
	Finland			0			0			0			0			0			0			0	1		1			0			0			0			0			0			0			0			0
	France			0			0			0			0		1	1			0			0			0			0			0			0		1	1	1		1			0			0		2	2
	Germany			0			0			0			0			0			0			0			0			0			0		1	1		1	1			0		1	1			0		1	1
	Great Britain			0			0			0			0			0			0	1		1		1	1		2	2			0	1		1		1	1		1	1			0			0	1		1
	Greece			0			0			0			0			0	1		1			0			0			0			0			0			0			0			0			0			0
	Hong Kong			0			0			0			0			0			0			0			0			0			0			0			0			0			0			0			0
	Hungary			0			0			0			0			0			0			0			0			0			0			0			0			0			0			0			0
	Iceland			0			0			0			0			0			0			0			0			0			0			0			0			0			0			0			0
	India			0			0			0			0			0			0			0			0			0			0			0			0			0			0			0			0
	Indonesia			0			0			0			0			0			0			0			0			0			0			0			0			0			0			0			0
	Iran			0			0			0			0			0	1		1			0			0			0			0			0	1		1			0			0			0			0
	Iraq			0			0			0			0			0			0			0			0			0			0			0			0			0			0			0			0
	Ireland			0			0			0			0			0			0			0			0			0			0			0			0			0			0			0			0
	Israel			0			0			0			0			0			0			0			0			0			0			0			0			0			0			0			0
	Italy			0			0			0			0			0			0			0			0			0			0			0			0			0		1	1			0			0
	Jamaica			0			0			0			0			0			0			0			0			0			0			0			0			0			0			0			0
	Japan			0			0			0			0			0			0			0			0			0			0			0			0			0			0			0			0
	Jordan			0			0			0			0			0			0			0			0			0			0			0			0			0			0			0			0
	Kazakhstan			0			0			0			0			0			0			0			0			0			0			0			0			0			0			0			0
	Kuwait			0			0			0			0			0			0			0			0			0			0			0			0			0			0			0			0
	Latvia			0			0			0			0			0			0			0			0			0			0			0			0			0			0			0			0
	Libyan Arab Jamahiriya			0			0			0			0			0			0			0			0			0			0			0			0			0			0			0			0
	Lithuania			0			0			0			0			0			0			0			0			0			0			0			0		1	1			0			0			0
	Luxemborg			0			0			0			0			0			0			0			0			0			0			0			0			0			0			0			0
	Macau			0			0			0			0			0			0			0			0			0			0			0			0			0			0			0			0
	Malaysia			0			0			0			0			0			0			0			0			0			0			0			0			0			0			0			0
	Mexico			0			0			0			0			0			0			0			0			0			0			0			0			0			0			0			0
	Mongolia			0			0			0			0			0			0			0			0			0			0			0			0			0			0			0			0
	Montenegro			0			0			0			0			0			0			0			0			0			0			0			0			0			0			0			0
	Morocco			0			0			0			0	1		1			0			0			0			0			0			0			0			0			0			0			0
	Mozambique			0			0			0			0			0			0			0			0			0			0			0			0			0			0			0			0
	Namibia	1		1			0			0			0			0			0			0			0			0			0			0			0			0			0			0			0
	Netherlands			0			0			0			0			0			0			0			0			0			0			0			0			0			0			0	1	1	2
	New Zealand			0			0			0			0			0			0			0			0			0			0			0			0			0			0			0			0
	Nicaragua			0			0			0			0			0			0			0			0			0			0			0			0			0			0			0			0
	Nigeria			0			0			0			0			0			0			0			0			0			0			0			0			0			0			0			0
	Norway			0			0			0			0			0			0			0			0			0			0			0			0			0			0			0			0
	Pakistan			0			0			0			0			0			0			0			0			0			0			0			0			0			0			0			0
	Panama			0			0			0			0			0			0			0			0			0			0			0			0			0			0			0			0
	Papua New Guinea			0			0			0			0			0			0			0			0			0			0			0			0			0			0			0			0
	Philippines			0			0			0			0			0			0			0			0			0			0			0			0			0			0			0			0
	Poland			0			0			0			0			0		1	1			0			0			0			0			0			0			0			0			0			0
	Portugal			0			0			0			0			0		1	1			0			0			0			0			0			0			0			0			0			0
	Qatar			0			0			0			0			0			0			0			0			0			0			0			0			0			0			0			0
	Russia			0			0		1	1	1		1	1	1	2		1	1			0			0	2		2		1	1	2		2		1	1			0	2		2			0			0
	Rwanda			0			0			0			0			0			0			0			0			0			0			0			0			0			0			0			0
	Saudi Arabia			0			0			0			0			0			0			0			0			0			0			0			0			0			0			0			0
	Senegal			0			0			0			0			0			0			0			0			0			0			0			0			0			0			0			0
	Serbia			0			0			0			0			0			0			0			0			0			0			0			0			0			0			0			0
	Slovakia			0			0			0			0			0			0			0			0			0			0			0			0			0			0			0			0
	Slovenia			0			0			0			0			0			0			0			0			0			0			0			0			0			0			0			0
	South Africa			0			0			0	1		1			0			0			0			0			0			0			0	2		2	3		3			0			0	1		1
	Spain	1		1	1	1	2			0			0	2		2	1		1			0			0			0			0			0			0			0			0			0			0
	Sri Lanka			0			0			0			0			0			0			0			0			0			0			0			0			0			0			0			0
	Sweden			0			0			0			0			0			0			0			0			0			0			0			0			0			0			0			0
	Switzerland			0			0			0			0			0			0			0			0			0			0			0			0			0			0			0			0
	Syrian Arab Republic			0			0			0			0			0			0			0			0			0			0			0			0			0			0			0			0
	Thailand			0			0			0			0			0			0			0			0			0			0			0			0			0			0			0			0
	Trinidad and Tobago			0			0			0			0			0			0			0			0			0			0			0			0			0			0			0			0
	Tunisia			0			0			0			0		1	1			0			0			0			0			0			0			0	1		1			0			0			0
	Turkey			0			0			0			0			0			0			0			0			0			0			0			0			0			0			0			0
	Ukraine			0			0			0		2	2			0		1	1			0			0			0			0	2		2			0			0			0			0			0
	United Arab Emirates			0			0			0			0			0			0			0	3		3			0			0			0			0			0			0			0			0
	USA			0			0			0			0		1	1	1		1			0		2	2			0			0			0			0			0			0	1		1	1		1
	Uzbekistan			0			0	1		1			0			0			0			0			0			0			0			0			0			0			0			0			0
	Venezuela			0			0			0			0			0	1		1			0			0			0			0			0			0			0			0			0			0
	Vietnam			0			0			0			0			0			0			0			0			0			0			0			0			0			0			0			0
	Virgin Islands			0			0			0			0			0			0			0			0			0			0			0			0			0			0			0			0
	Chinese Tapei			0			0			0			0			0			0			0			0			0			0			0			0			0			0			0			0
[truncated: 27 more columns]

## Sheet: Bronze medals
		T11			T11/12			T11-13			T12			T13			T20			T33			T34			T35			T35-38			T36			T37			T38			T42			T42-47			T44
		M	F	Total	M	F	Total	M	F	Total	M	F	Total	M	F	Total	M	F	Total	M	F	Total	M	F	Total	M	F	Total	M	F	T	M	F	Total	M	F	Total	M	F	Total	M	F	Total	M	F	Total	M	F	Total
Country	Afghanistan			0			0			0			0			0			0			0			0			0			0			0			0			0			0			0			0
	Algeria			0			0			0			0			0			0			0			0			0			0			0	1		1			0			0			0			0
	Angola			0			0			0			0			0			0			0			0			0			0			0			0			0			0			0			0
	Argentina			0			0			0			0			0			0			0			0			0			0		1	1			0			0			0			0			0
	Australia			0			0			0			0	1		1			0			0			0		1	1			0	1		1			0	1	1	2			0			0			0
	Austria			0			0			0			0			0			0			0			0			0			0			0			0			0			0			0			0
	Azerbaijan			0			0			0		1	1			0			0			0			0			0			0			0			0			0			0			0			0
	Bahrain			0			0			0			0			0			0			0			0			0			0			0			0			0			0			0			0
	Belarus			0			0			0			0			0			0			0			0			0			0			0			0			0			0			0			0
	Belgium			0			0			0			0			0			0			0			0			0			0			0			0			0			0			0			0
	Bermuda			0			0			0			0			0			0			0			0			0			0			0			0			0			0			0			0
	Brazil	1	4	5			0			0			0			0			0			0			0			0			0			0			0			0		1	1			0	1		1
	Bulgaria			0			0			0			0			0			0			0			0			0			0			0			0			0			0			0			0
	Cameroon			0			0			0			0			0			0			0			0			0			0			0			0			0			0			0			0
	Canada			0			0			0			0			0			0			0			0			0			0			0			0			0			0			0			0
	Cape Verde			0			0			0			0			0			0			0			0			0			0			0			0			0			0			0			0
	Chile			0			0			0			0		1	1			0			0			0			0			0			0			0			0			0			0			0
	China	1		1			0			0		1	1			0			0			0			0	1		1		1	1			0	1		1	2	1	3			0			0			0
	Columbia			0			0			0			0			0			0			0			0			0			0			0			0			0			0			0			0
	Croatia			0			0			0			0			0			0			0			0			0			0			0			0			0			0			0			0
	Cuba			0			0			0			0			0			0			0			0			0			0			0			0			0			0			0			0
	Cyprus			0			0			0			0			0			0			0			0			0			0			0			0			0			0			0			0
	Czech Republic			0			0			0			0			0			0			0			0			0			0			0			0			0			0			0			0
	Denmark			0			0			0			0			0			0			0			0			0			0			0			0			0	2		2			0			0
	Egypt			0			0			0			0			0			0			0			0			0			0			0			0			0			0			0			0
	Estonia			0			0			0			0			0			0			0			0			0			0			0			0			0			0			0			0
	Ethiopia			0			0			0			0			0			0			0			0			0			0			0			0			0			0			0			0
	Finland			0			0			0			0			0			0			0	2		2			0			0			0			0			0			0			0			0
	France	1		1			0			0			0			0			0			0			0			0			0			0			0	1		1			0			0			0
	Germany			0			0			0			0			0			0			0			0			0			0		1	1			0			0		1	1			0	1		1
	Great Britain			0			0			0			0			0			0	1		1		2	2			0			0			0			0	1		1			0			0			0
	Greece			0			0			0			0			0			0			0			0			0			0			0			0			0			0			0			0
	Hong Kong			0			0			0			0			0			0			0			0			0			0			0			0			0			0			0			0
	Hungary			0			0			0			0			0			0			0			0			0			0			0			0			0			0			0			0
	Iceland			0			0			0			0			0			0			0			0			0			0			0			0			0			0			0			0
	India			0			0			0			0			0			0			0			0			0			0			0			0			0			0			0			0
	Indonesia			0			0			0			0			0			0			0			0			0			0			0			0			0			0			0			0
	Iran			0			0			0			0			0			0			0			0			0			0			0			0			0			0			0			0
	Iraq			0			0			0			0			0			0			0			0			0			0			0			0			0			0			0			0
	Ireland			0			0			0			0			0			0			0			0			0			0			0			0			0			0			0			0
	Israel			0			0			0			0			0			0			0			0			0			0			0			0			0			0			0			0
	Italy			0			0			0			0			0			0			0			0		1	1			0			0			0			0			0			0			0
	Jamaica			0			0			0			0			0			0			0			0			0			0			0			0			0			0			0			0
	Japan	1		1	1	1	2			0			0			0			0			0			0			0			0			0			0			0			0			0		1	1
	Jordan			0			0			0			0			0			0			0			0			0			0			0			0			0			0			0			0
	Kazakhstan			0			0			0			0			0			0			0			0			0			0			0			0			0			0			0			0
	Kuwait			0			0			0			0			0			0			0			0			0			0			0			0			0			0			0			0
	Latvia			0			0			0			0			0			0			0			0			0			0			0			0			0			0			0			0
	Libyan Arab Jamahiriya			0			0			0			0			0			0			0			0			0			0			0			0			0			0			0			0
	Lithuania			0			0			0			0			0			0			0			0			0			0			0			0			0			0			0			0
	Luxemborg			0			0			0			0			0			0			0			0			0			0			0			0			0			0			0			0
	Macau			0			0			0			0			0			0			0			0			0			0			0			0			0			0			0			0
	Malaysia			0			0			0	1		1			0		1	1			0			0			0			0			0			0			0			0			0			0
	Mexico			0			0			0			0			0			0			0			0			0			0			0			0			0			0			0			0
	Mongolia			0			0			0			0			0			0			0			0			0			0			0			0			0			0			0			0
	Montenegro			0			0			0			0			0			0			0			0			0			0			0			0			0			0			0			0
	Morocco			0			0			0			0	3	2	5			0			0			0			0			0			0			0			0			0			0			0
	Mozambique			0			0			0		1	1			0			0			0			0			0			0			0			0			0			0			0			0
	Namibia			0			0			0			0	1		1			0			0			0			0			0			0		1	1			0			0			0			0
	Netherlands			0			0			0			0			0	1	1	2			0		1	1			0			0			0			0			0			0			0		1	1
	New Zealand			0			0			0			0	1		1			0			0			0			0			0			0			0			0			0			0			0
	Nicaragua			0			0			0			0			0			0			0			0			0			0			0			0			0			0			0			0
	Nigeria			0			0			0			0			0			0			0			0			0			0			0			0			0			0			0			0
	Norway			0			0			0			0			0			0			0			0			0			0			0			0			0			0			0			0
	Pakistan			0			0			0			0			0			0			0			0			0			0			0			0			0			0			0			0
	Panama			0			0			0			0			0			0			0			0			0			0			0			0			0			0			0			0
	Papua New Guinea			0			0			0			0			0			0			0			0			0			0			0			0			0			0			0			0
	Philippines			0			0			0			0			0			0			0			0			0			0			0			0			0			0			0			0
	Poland			0			0			0			0	1		1			0			0			0			0			0			0			0			0	1		1			0			0
	Portugal			0			0			0			0			0	1	1	2			0			0			0			0			0			0			0			0			0			0
	Qatar			0			0			0			0			0			0			0			0			0			0			0			0			0			0			0			0
	Russia			0			0			0	3		3			0	3		3			0			0			0			0	2		2	1	3	4	1	1	2			0	1		1	1		1
	Rwanda			0			0			0			0			0			0			0			0			0			0			0			0			0			0			0			0
	Saudi Arabia			0			0			0			0			0			0			0			0			0			0			0			0			0			0			0			0
	Senegal			0			0			0			0			0			0			0			0			0			0			0			0			0			0			0			0
	Serbia			0			0			0			0			0			0			0			0			0			0			0			0			0			0			0			0
	Slovakia			0			0			0			0			0			0			0			0			0			0			0			0			0			0			0			0
	Slovenia			0			0			0			0			0			0			0			0			0			0			0			0			0			0			0			0
	South Africa			0			0			0	1		1			0			0			0			0			0			0			0	2		2			0			0			0			0
	Spain			0			0	1	1	2		1	1			0			0			0			0			0			0			0			0			0			0			0			0
	Sri Lanka			0			0			0			0			0			0			0			0			0			0			0			0			0			0			0			0
	Sweden		1	1			0			0			0			0			0			0			0			0			0			0			0			0			0			0			0
	Switzerland			0			0			0			0			0			0			0	1		1			0			0			0			0			0			0			0			0
	Syrian Arab Republic			0			0			0			0			0			0			0			0			0			0			0			0			0			0			0			0
	Thailand			0			0			0			0			0			0			0			0			0			0			0			0			0			0			0			0
	Trinidad and Tobago			0			0			0			0			0			0			0			0			0			0			0			0			0			0			0		1	1
	Tunisia			0			0			0			0			0			0			0			0			0			0			0			0			0			0			0			0
	Turkey	1		1			0			0			0			0			0			0			0			0			0			0			0			0			0			0			0
	Ukraine	1		1			0			0			0			0	1	2	3			0			0	1		1			0	2		2			0		1	1			0			0			0
	United Arab Emirates			0			0			0			0			0			0			0	1		1			0			0			0			0			0			0			0			0
	USA			0			0			0			0		1	1			0			0			0			0			0			0			0			0	1		1			0	2	1	3
	Uzbekistan			0			0			0			0	1		1			0			0			0			0			0			0			0			0			0			0			0
	Venezuela			0			0			0			0			0			0			0			0			0			0			0			0			0			0			0			0
	Vietnam			0			0			0			0			0			0			0			0			0			0			0			0			0			0			0			0
	Virgin Islands			0			0			0			0			0			0			0			0			0			0			0			0			0			0			0			0
	Chinese Tapei			0			0			0			0			0			0			0			0			0			0			0			0			0			0			0			0
[truncated: 27 more columns]
