# Supplementary material for: “A More Equitable Society”: The Politics of Global Fairness in Paralympic Sport
Source: PLoS One. 2016 Dec 12;11(12):e0167481. doi: 10.1371/journal.pone.0167481 (PMC5152818; doi:10.1371/journal.pone.0167481)
Supplement: S5 Table — Spreadsheet showing non-participating countries' socio-economic statistics as made available by the World Bank (XLSX) [file pone.0167481.s005.xlsx]

## Sheet: World Bank data
Country (Non-participating)	World Bank Classification	Population	GDP per Capita
Albania	Upper middle income	2904780	4437.81		Labels:
American Samoa	Upper middle income	55316	..		2012 data used
Andorra	High income: nonOECD	82326	41630.1		info not available on WB website
Antigua and Barbuda	High income: nonOECD	88152	12817.8
Armenia	Lower middle income	2967984	3417.17
Aruba	High income: nonOECD	101936	25353.8
Bahamas, The	High income: nonOECD	366711	21514.9
Bangladesh	Lower middle income	153405612	838.548
Barbados	High income: nonOECD	280602	15530.9
Belize	Upper middle income	329193	4517.12
Benin	Low income	9779391	799.036
Bhutan	Lower middle income	732246	2485.79
Bolivia	Lower middle income	10078238	2377.7
Bosnia and Herzegovina	Upper middle income	3832310	4779.66
Botswana	Upper middle income	2089706	7504.85
Brunei Darussalam	High income: nonOECD	399443	41787
Burkina Faso	Low income	16106851	665.807
Burundi	Low income	9790151	240.614
Cambodia	Low income	14593099	879.151
Cayman Islands	High income: nonOECD	56580	..
Central African Republic	Low income	4530903	484.583
Chad	Low income	12298512	988.443
Channel Islands		160489	..
Comoros	Low income	715972	790.568
Congo, Dem. Rep.	Low income	68087376	350.271
Congo, Rep.	Lower middle income	4177435	3453.22
Costa Rica	Upper middle income	4600487	8963.68
Cote d'Ivoire	Lower middle income	20604172	1231.87
Curacao	High income: nonOECD	150831	..
Djibouti	Lower middle income	841802	1472.01
Dominica	Upper middle income	71402	7023.35
Dominican Republic	Upper middle income	10027140	5820.4
Ecuador	Upper middle income	15177280	5223.38
El Salvador	Lower middle income	6055208	3821.34
Equatorial Guinea	High income: nonOECD	750918	22944.9
Eritrea	Low income	4789568	544.462
Faeroe Islands	High income: nonOECD	48492	50910.4
Fiji	Upper middle income	867327	4351.92
French Polynesia	High income: nonOECD	270862	..
Gabon	Upper middle income	1577298	11530.1
Gambia, The	Low income	1749099	516.984
Georgia	Lower middle income	4483350	3219.61
Ghana	Lower middle income	24928503	1587.19
Greenland	High income: nonOECD	56890	..
Grenada	Upper middle income	105070	7410.76
Guam	High income: nonOECD	160858	..
Guatemala	Lower middle income	15049280	3166.58
Guinea	Low income	11316351	447.791
Guinea-Bissau	Low income	1673509	659.484
Guyana	Lower middle income	755883	3408.73
Haiti	Low income	10144890	740.948
Honduras	Lower middle income	7621414	2323.76
Isle of Man	High income: nonOECD	85069	..
Kenya	Lower middle income	41419954	1012.88
Kiribati	Lower middle income	104662	1645.81
Korea, Dem. Rep.	Low income	24631359	..
Korea, Rep.	High income: OECD	49779440	24155.8
Kosovo		1790957	3736.84
Kyrgyz Republic	Lower middle income	5514600	1123.88
Lao PDR	Lower middle income	6366909	1300.98
Lebanon	Upper middle income	4388637	9132.43
Lesotho	Lower middle income	2032950	1241.21
Liberia	Low income	4079574	378.814
Liechtenstein	High income: nonOECD	36537	157093
Macedonia, FYR	Upper middle income	2065888	5079.96
Madagascar	Low income	21678867	456.329
Malawi	Low income	15226813	369.604
Maldives	Upper middle income	377000	6497.55
Mali	Low income	15639115	680.828
Malta	High income: nonOECD	416268	22347.7
Marshall Islands	Upper middle income	52541	3290.03
Mauritania	Lower middle income	3683221	1390.93
Mauritius	Upper middle income	1252404	8984.63
Micronesia, Fed. Sts.	Lower middle income	103476	2998.64
Moldova	Lower middle income	3559986	1970.57
Monaco	High income: nonOECD	37189	163352
Myanmar	Lower middle income	52125411	1421.5
Nepal	Low income	27179237	695.883
New Caledonia	High income: nonOECD	254000	..
Niger	Low income	16946485	378.201
Northern Mariana Islands	High income: nonOECD	53234	..
Oman	High income: nonOECD	3210003	21164.3
Palau	Upper middle income	20606	9765.31
Paraguay	Upper middle income	6293763	3983.5
Peru	Upper middle income	29759891	5731.35
Puerto Rico	High income: nonOECD	3686771	27219.4
Romania	Upper middle income	20147528	9200.28
Samoa	Lower middle income	187434	4063.56
San Marino	High income: nonOECD	30938	..
Sao Tome and Principe	Lower middle income	174646	1374.13
Seychelles	High income: nonOECD	87441	12189
Sierra Leone	Low income	5908908	490.879
Singapore	High income: nonOECD	5183700	53121.2
Sint Maarten (Dutch part)	High income: nonOECD	33435	..
Solomon Islands	Lower middle income	537648	1648.85
Somalia	Low income	9806670	..
South Sudan	Low income	10510122	1696.15
St. Kitts and Nevis	High income: nonOECD	52998	13737.3
St. Lucia	Upper middle income	179278	7195.67
St. Martin (French part)	High income: nonOECD	30615	..
St. Vincent and the Grenadines	Upper middle income	109341	6183.68
Sudan	Lower middle income	36918193	1596.45
Suriname	Upper middle income	523439	8448.5
Swaziland	Lower middle income	1212458	4093.38
Tajikistan	Lower middle income	7753925	841.22
Tanzania	Low income	47122998	740.384
Timor-Leste	Lower middle income	1120392	1015.72
Togo	Low income	6566179	572.026
Tonga	Upper middle income	104392	4226.69
Turkmenistan	Upper middle income	5106672	5724.54
Turks and Caicos Islands	High income: nonOECD	31727	..
Tuvalu	Upper middle income	9844	3993.5
Uganda	Low income	34260342	591.439
Uruguay	High income: nonOECD	3385610	14166.6
Vanuatu	Lower middle income	241876	3275.02
West Bank and Gaza	Lower middle income	3927051	2664.95
Yemen, Rep.	Lower middle income	24234940	1282.4
Zambia	Lower middle income	14343526	1654.53
Zimbabwe	Low income	14255592	768.556
